# Supplementary material
Source: Springer Nature journal article supplement (https://www.springermedizin.de/resource/supplementary/12936_2009_1280_MOESM2_ESM.pdf/9549394)
Supplement: MOESM2 [file 9549394]

### Southern Coastal plain (Yoto)

### Central Plateaux (Ogou)

### Northern Savannah (Tone)

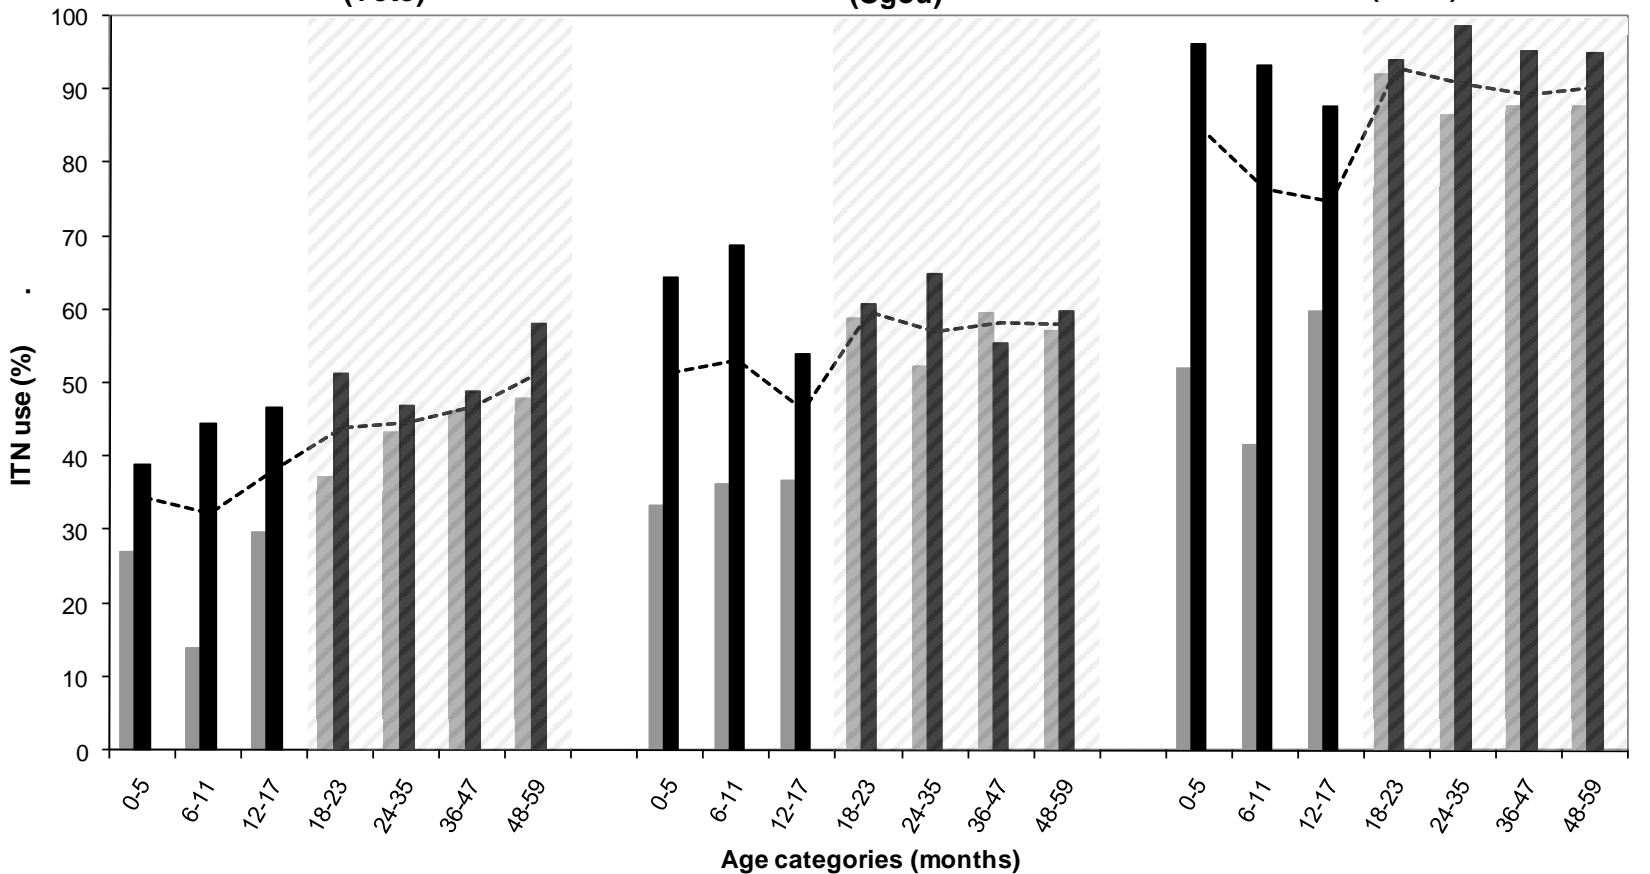

■ No sibling targeted by campaign in HH

■ Sibling (also) targeted by campaign in HH

▨ Campaign target age

- - - Average both groups
